# Supplementary material for: The Prognostic and Predictive Role of Somatic BRCA Mutations in Ovarian Cancer: Results from a Multicenter Cohort Study
Source: PubMed Central journal article supplement (PMC8003908; doi:10.3390/diagnostics11030565), 2021-03-21
Supplement: diagnostics-11-00565-s001.pdf [file diagnostics-11-00565-s001.pdf]

## Supplementary Materials

**Table 1.**

Univariate analysis of pre-specified parameters for OS and PFS.

|                         | OS         |           |           | PFS        |           |           |
|-------------------------|------------|-----------|-----------|------------|-----------|-----------|
|                         | P value    |           |           | P value    |           |           |
|                         | wtBRC<br>A | gBRC<br>A | sBRC<br>A | wtBRC<br>A | gBRC<br>A | sBRC<br>A |
| Age $\geq$ 50 years     | 0.005      | 0.54      | 0.4       | 0.001      | 0.56      | 0.55      |
| BCFH                    | 0.28       | 0.63      | 0.44      | 0.28       | 0.87      | 0.16      |
| OCFH                    | 0.92       | 0.79      | 0.67      | 0.84       | 0.39      | 0.14      |
| BCOCFH                  | 0.52       | 0.63      | 0.29      | 0.48       | 0.69      | 0.57      |
| FIGO stage 3-4          | 0.04       | 0.71      | 0.33      | 0.001      | 0.13      | 0.73      |
| Histoty<br>pe<br>Serous | 0.03       | 0.77      | 0.51      | 0.25       | 0.81      | 0.81      |
| Surgery<br>(no)         | 0.01       | 0.001     | 0.09      | 0.001      | 0.75      | 0.001     |
| Residua<br>l (yes)      | 0.02       | 0.05      | 0.67      | 0.01       | 0.13      | 0.35      |
